# Supplementary material for: REM sleep behaviour disorder in patients without synucleinopathy
Source: PubMed Central journal article supplement (PMC7569384; doi:10.1136/jnnp-2020-323475), 2020-08-13

**Supplementary figure.** Flow diagram illustrating the number of articles identified through database search and number of articles excluded at each stage

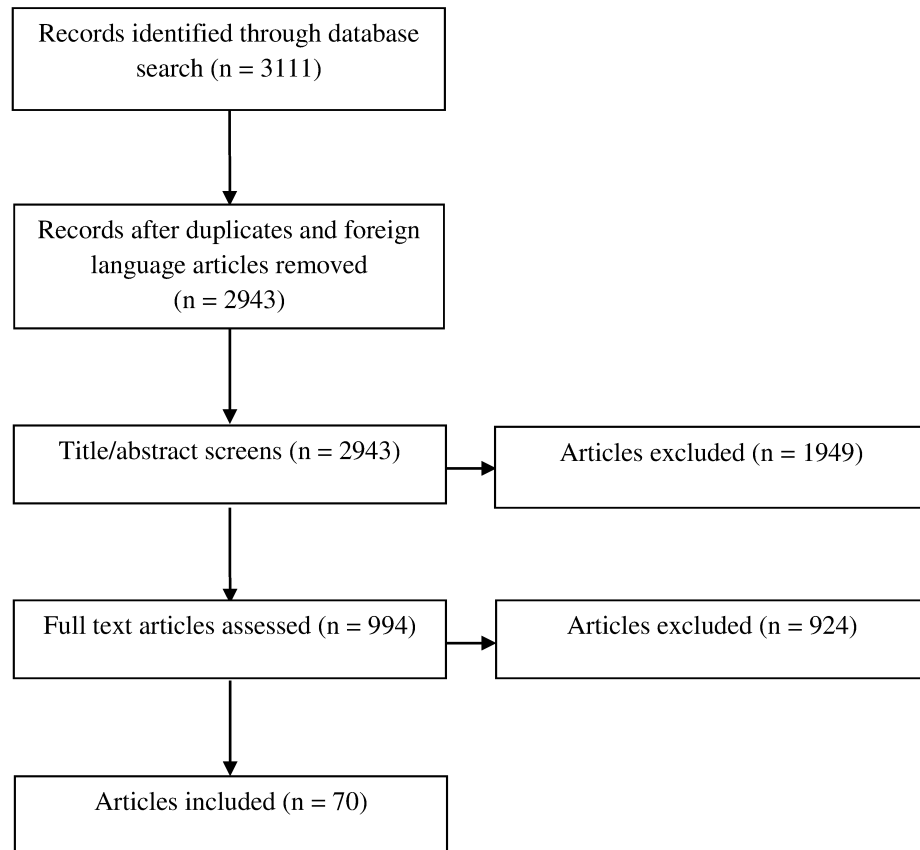

Supplement: jnnp-2020-323475supp001.pdf [file jnnp-2020-323475supp001.pdf]
